# Supplementary material for: Targeting homologous recombination deficiency in uterine leiomyosarcoma
Source: PubMed Central journal article supplement (PMC10157936; doi:10.1186/s13046-023-02687-0), 2023-05-04
Supplement: 13046_2023_2687_MOESM1_ESM.pdf [file 13046_2023_2687_MOESM1_ESM.pdf]

Dall et al. Supplementary Table 1

| Sample ID             | HR status of uLMS | Gene  | Variant                                  | Classification (ClinVar) | Loss of wildtype allele(s) | CHORD | HRDetect | Method of Detection |
|-----------------------|-------------------|-------|------------------------------------------|--------------------------|----------------------------|-------|----------|---------------------|
| uLMS#122 <sup>1</sup> | HRD               | BRCA2 | deletion                                 | N/A                      | homozygous                 | 72%   | 0.906    | WGS                 |
| uLMS#122 <sup>1</sup> | HRD               | PALB2 | deletion                                 | N/A                      | heterozygous               |       |          | WGS                 |
| uLMS#122 <sup>2</sup> | HRD               | PRKDC | NM_006904:c.4778T>C: exon37:p.V1593A     | Uncertain                | N/A                        | 80%   | 0.979    | WGS                 |
| uLMS#122 <sup>2</sup> | HRD               | PRKDC | NM_006904:c.2476_2503del:exon22:p.F826fs | Uncertain                | N/A                        |       |          | WGS                 |
| uLMS#227              | HRD               |       | COSMIC mutational signature 3            | N/A                      |                            | N/A   | N/A      | WGS                 |
| uLMS#347 <sup>^</sup> | HRD               | BRCA2 | NM_000059.3: c.464G>C                    | Uncertain                | Uncertain                  | N/A   | N/A      | WES                 |
| uLMS#347 <sup>^</sup> | HRD               | BRCA2 | deletion                                 | N/A                      | homozygous                 | N/A   | N/A      | WES                 |
| uLMS#438              | HRD               | BRCA2 | deletion                                 | N/A                      | homozygous                 | N/A   | N/A      | TSO500              |
| uLMS#683              | HRD               | BRCA2 | deletion                                 | N/A                      | homozygous                 | N/A   | N/A      | TSO500              |
| uLMS#463              | HRP               | BRCA2 | NM_000059.3:c.1953_1957dupTTCTG;p.E653fs | Pathogenic               | heterozygous               | 1%    | 0        | WGS/BRCA1/2 Panel   |
| uLMS#146              | HRP               | BRCA2 | NM_000059.3:c.1_10257del                 | Pathogenic               | heterozygous               | N/A   | N/A      | BRCA1/2 Panel       |

<sup>1</sup> First Sample analysed

<sup>2</sup> Second Sample analysed

<sup>^</sup> Germline variant
