# Supplementary material for: Targeting homologous recombination deficiency in uterine leiomyosarcoma
Source: PubMed Central journal article supplement (PMC10157936; doi:10.1186/s13046-023-02687-0), 2023-05-04
Supplement: 13046_2023_2687_MOESM2_ESM.pdf [file 13046_2023_2687_MOESM2_ESM.pdf]

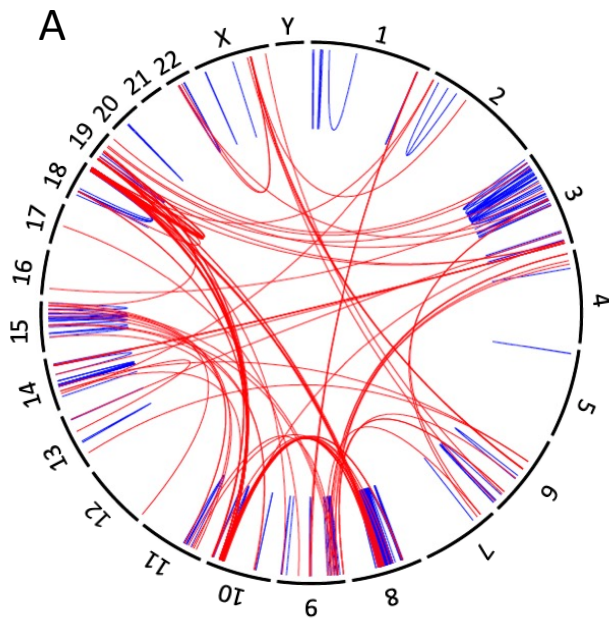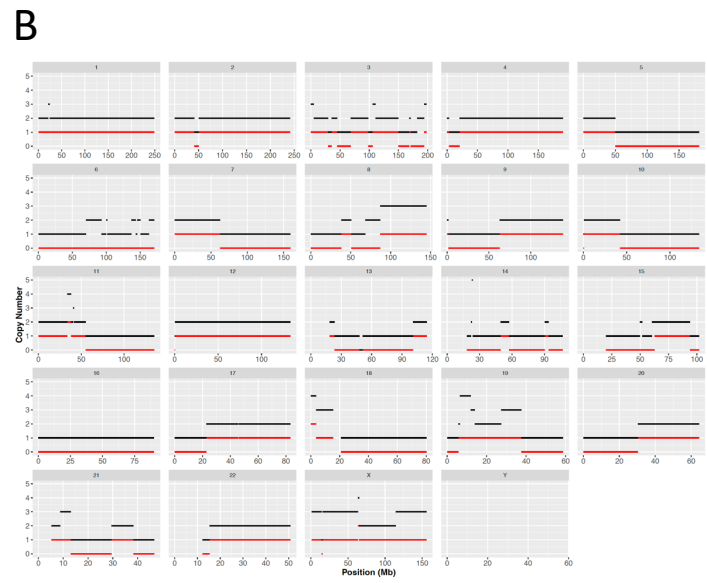

**Supplementary Figure 1.** (A) Structural variants plot generated from WGS data of uLMS227 primary patient sample showing intra-chromosomal rearrangements. (B) Copy number profile generated from the uLMS227 patient sample. Total copy number is shown in black and minor copy number in red.

uLMS122 patient tumour

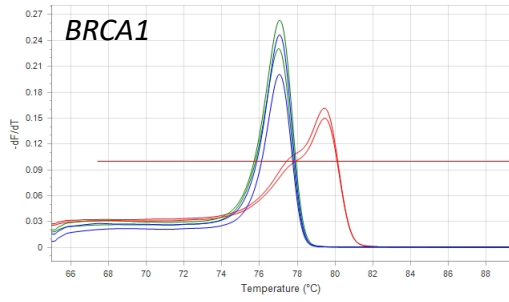

uLMS122 PDX

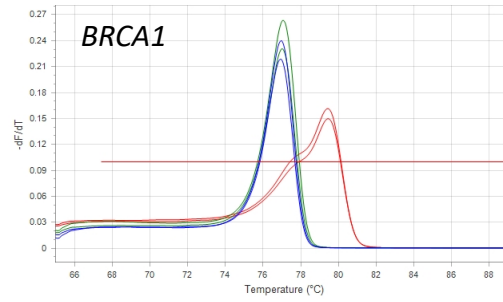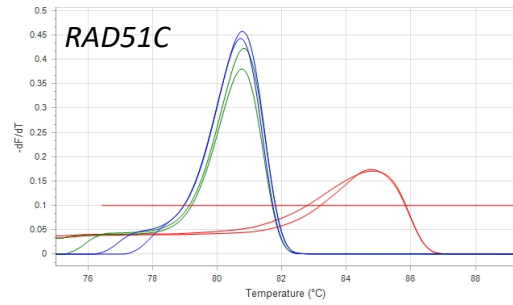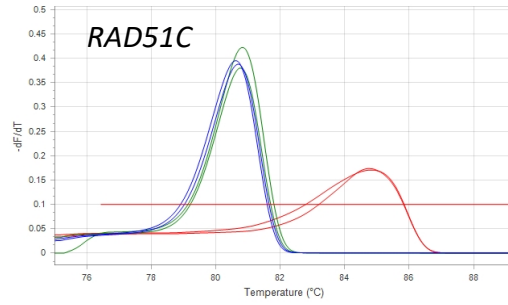

**Supplementary Figure 2.** Methylation analysis of the *BRCA1* and *RAD51C* promoters. Red lines indicate a 100% methylated control, blue lines indicated 0% methylated control and the green line represents the uLMS122 sample (both patient and PDX sample).
